# Supplementary material for: Liquid crystal alignment behavior on transparent cellulose films
Source: Royal Society of Chemistry journal article supplement (doi:10.1039/c5ra03713a), 2015-01-01
Supplement: c5ra03713a1.pdf [file c5ra03713a1.pdf]

Electronic Supplementary Information (ESI) for the manuscript entitled:

## Liquid Crystal Alignment Behavior on Transparent Cellulose Films

Hyo Kang,<sup>a</sup> Jong-Chan Lee,<sup>b</sup> Byeong-uk Nam<sup>c</sup> and Jin Woo Bae<sup>\*d</sup>

<sup>a</sup> Department of Chemical Engineering, Dong-A University, Nakdong-Daero 550beon-gil, Saha-gu, Busan, 604-714, Republic of Korea.

<sup>b</sup> School of Chemical and Biological Engineering and Institute of Chemical Processes, Seoul National University, 599 Gwanak-ro, Gwanak-gu, Seoul 151-742, Republic of Korea.

<sup>c</sup> School of Energy, Materials and Chemical Engineering, Korea University of Technology and Education, Chungnam 330-708, Republic of Korea.

<sup>d</sup> Department of Advanced Materials Engineering for Information & Electronics, Kyung Hee University, Yongin, Gyeonggi-do 446-701, Republic of Korea.

\*Corresponding Author. (E-mail: [jwbae79@gmail.com](mailto:jwbae79@gmail.com); Tel: +82-31-201-2374; Fax: +82-31-204-2530)

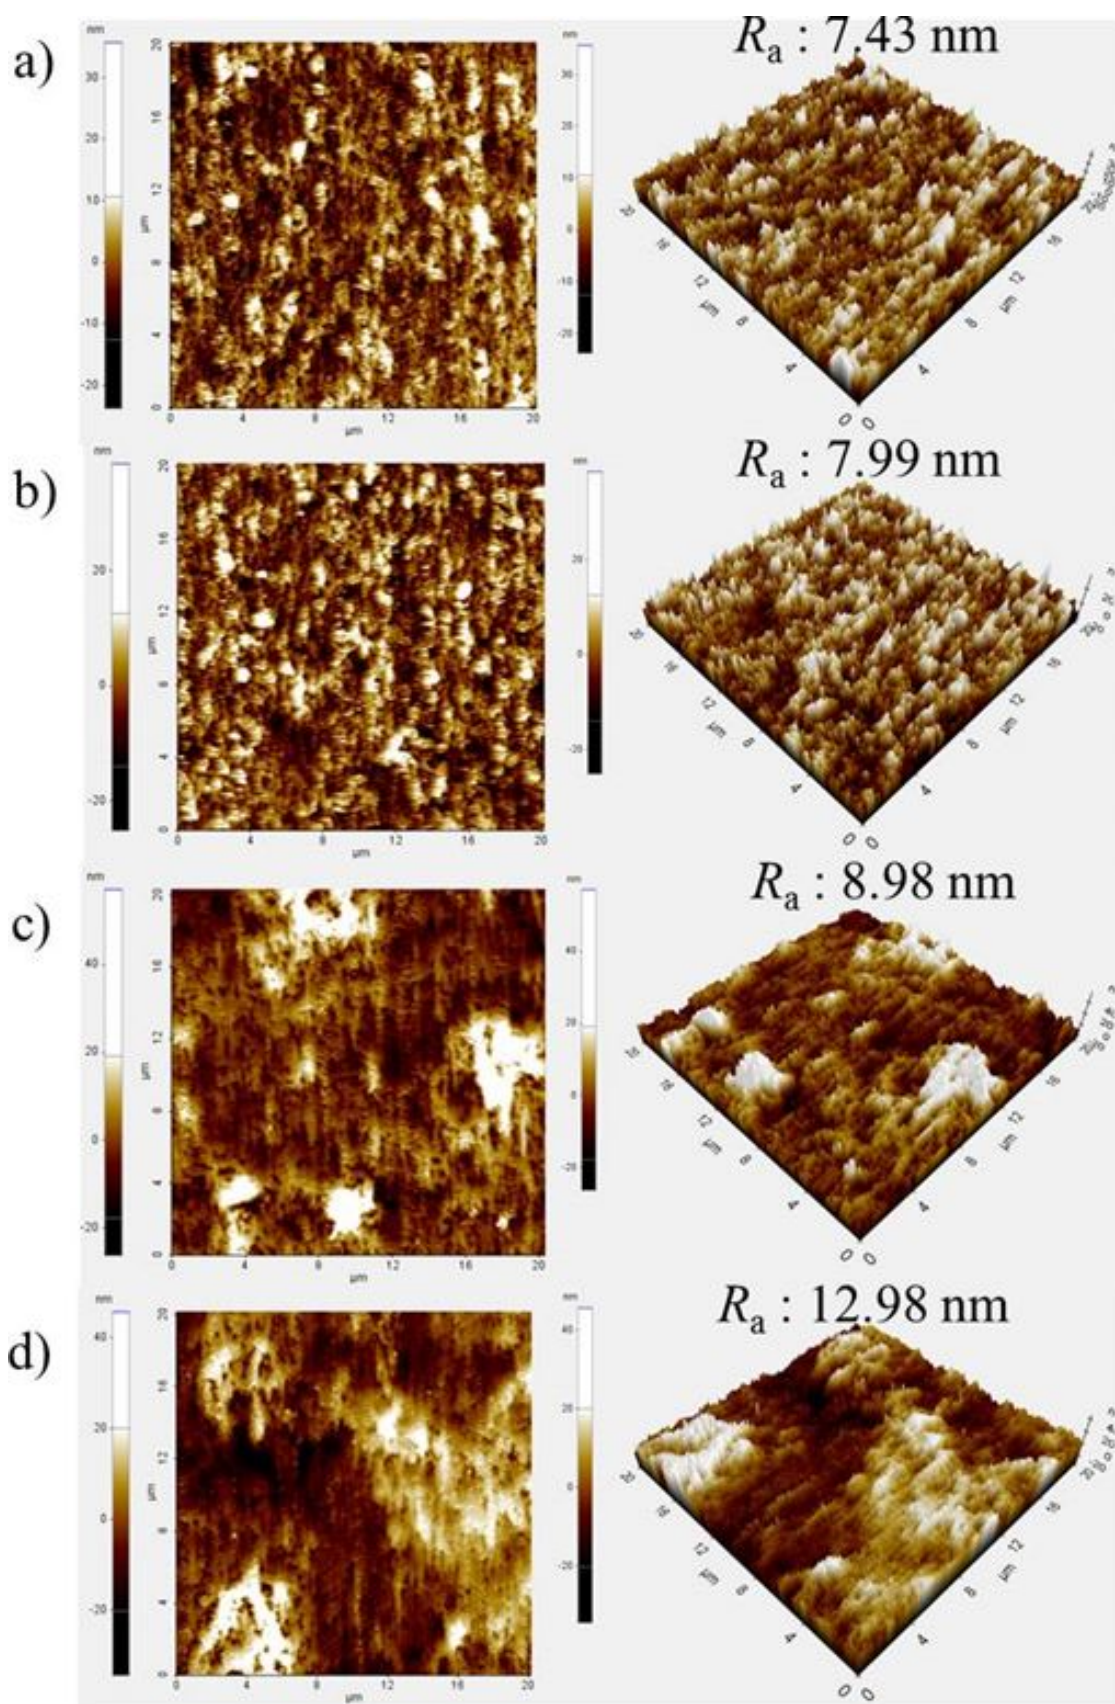

Figure S1. AFM images of the unrubbed cellulose film fabricated using a (a) 1 wt%, (2) 3 wt%, (3) 5 wt%, and (4) 10 wt% solution by spin coating (4000 rpm, 60 sec).
